# Supplementary material
Source: PubMed Central journal article supplement (PMC8429412)

Figure S1

**A**

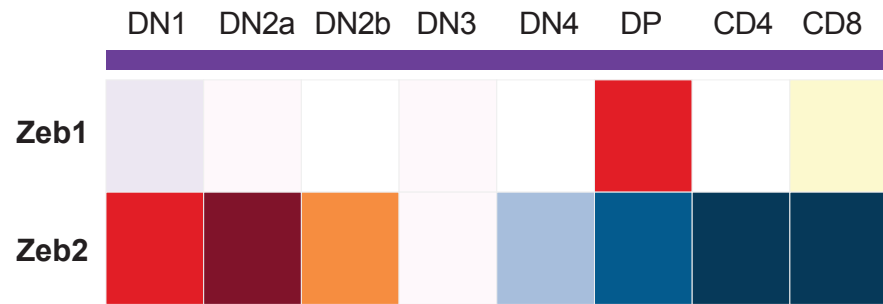

**B**

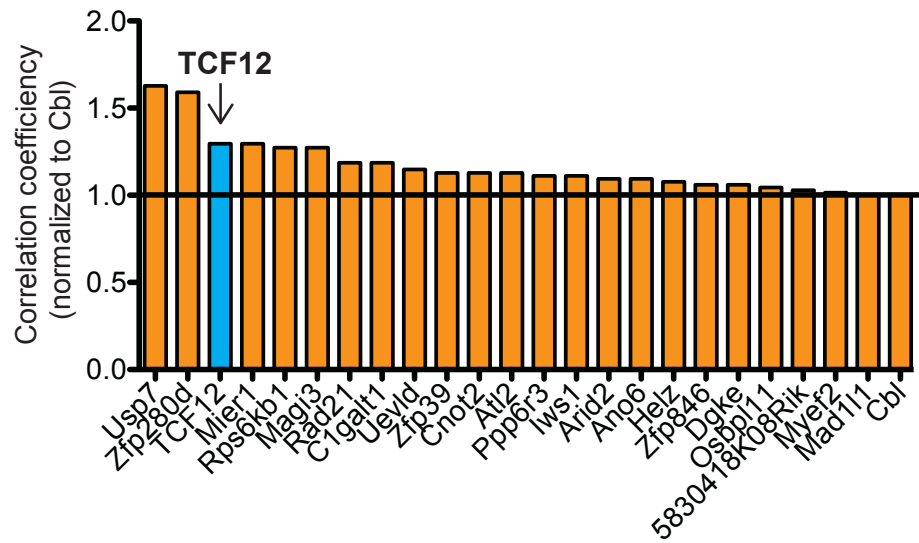

Figure S2

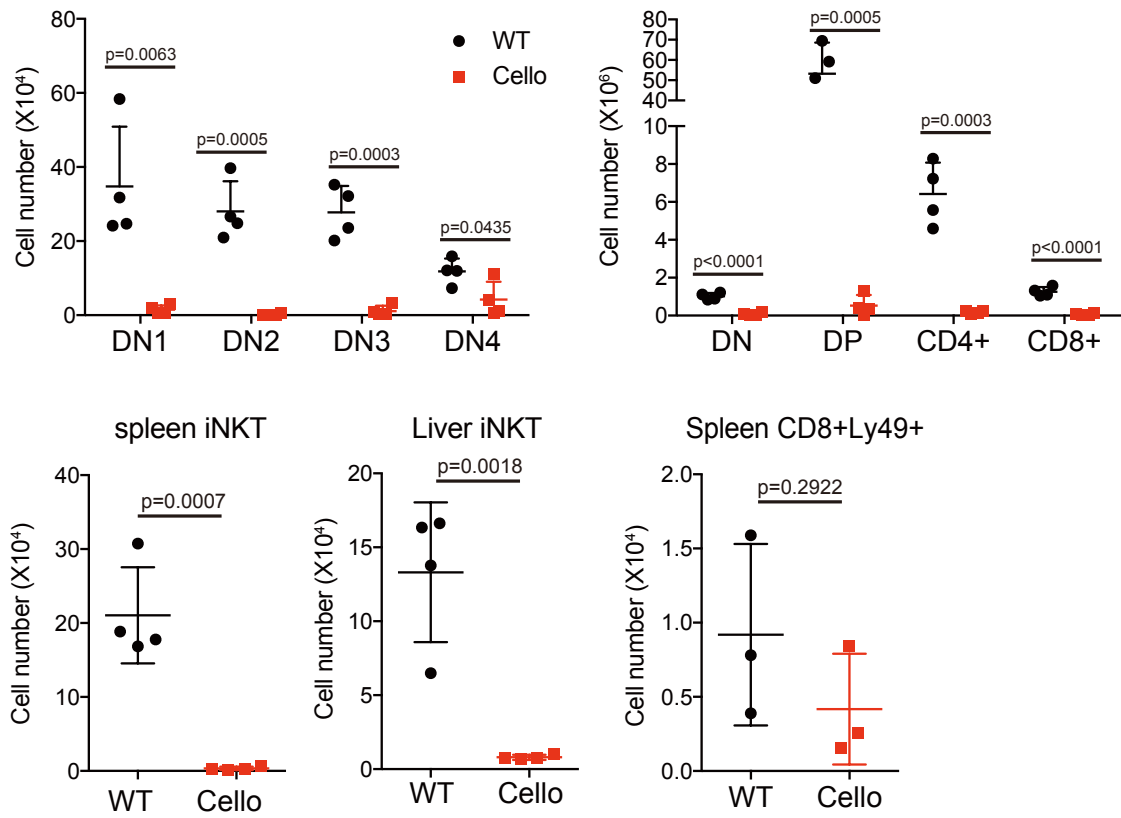

**Figure S3**

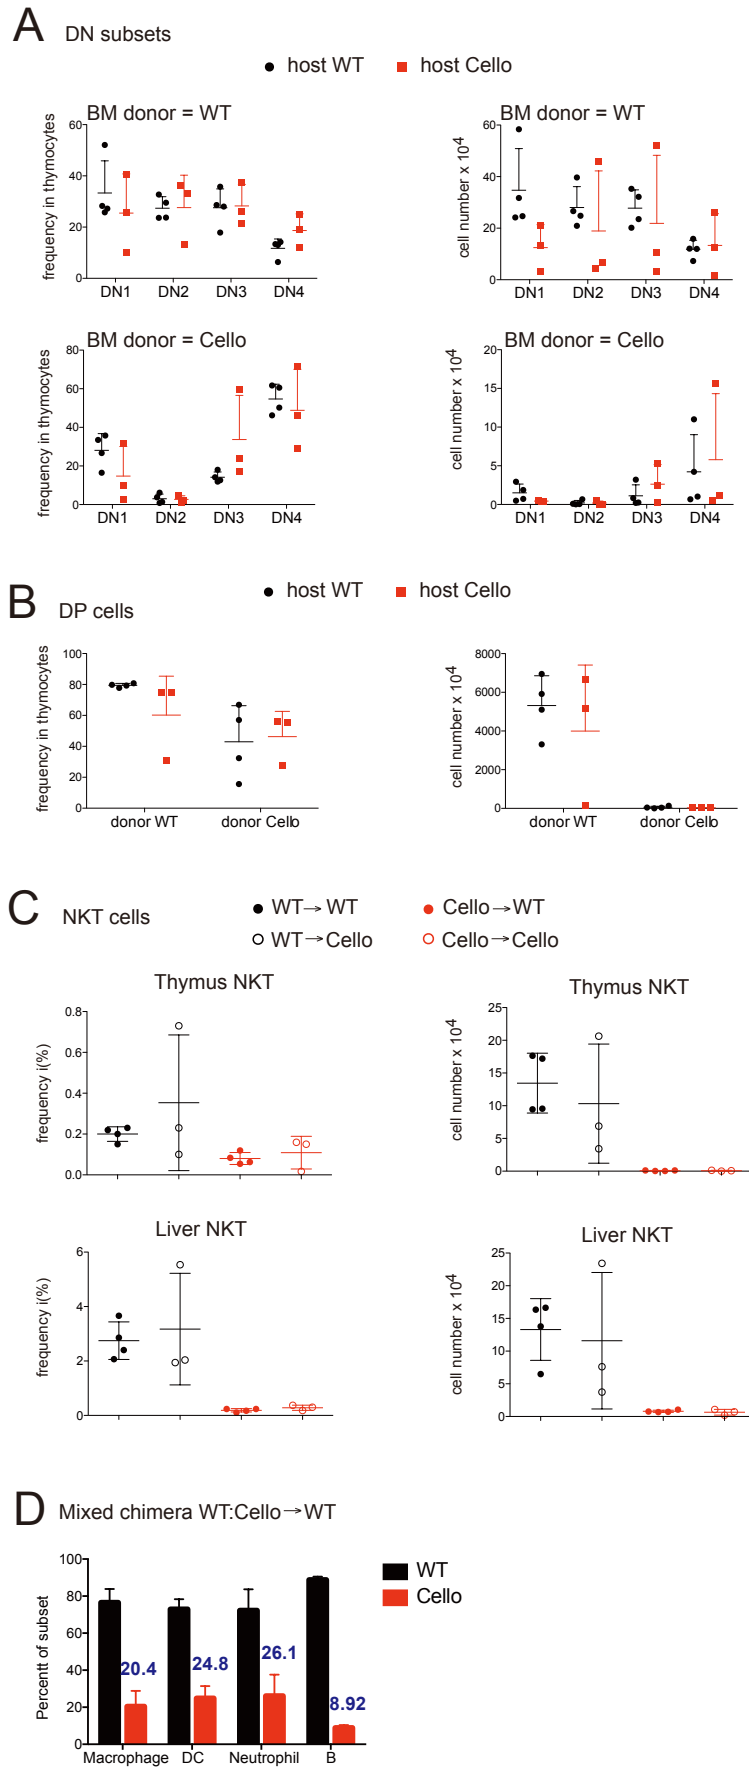

Figure S4

A

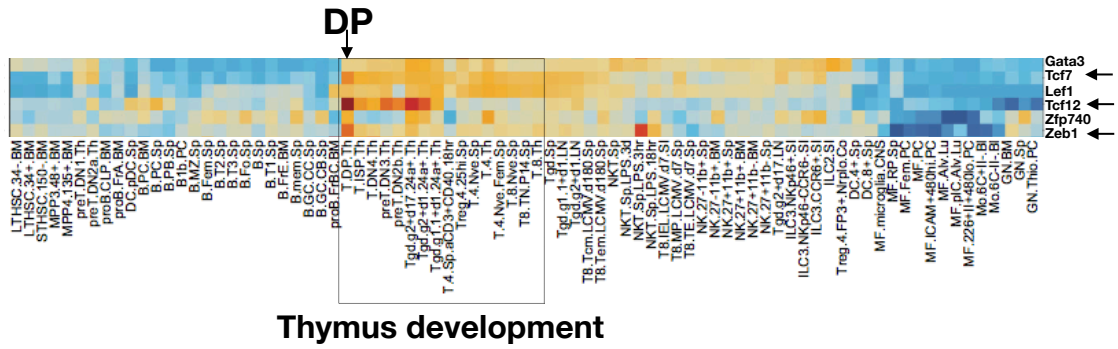

B

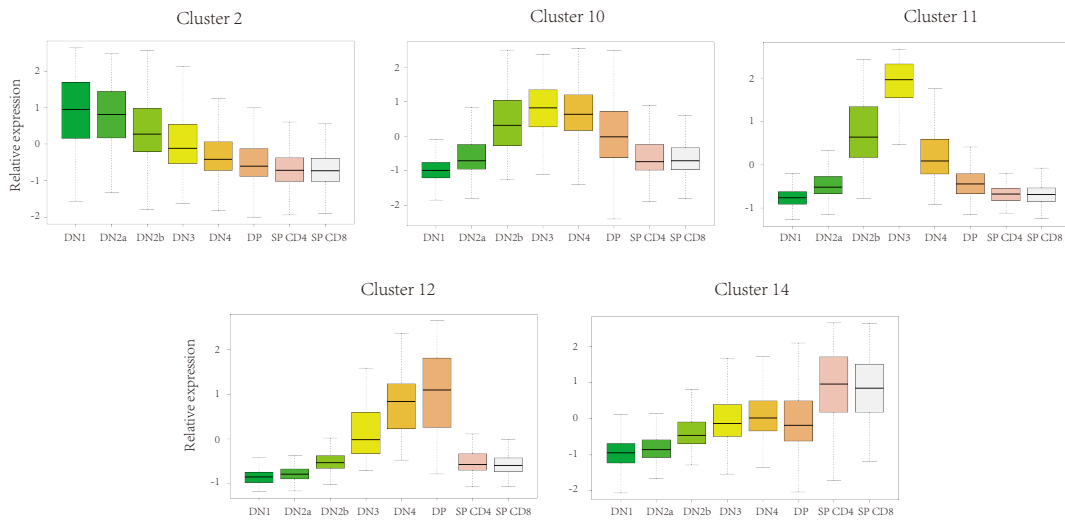

Supplement: 41423_2020_459_MOESM1_ESM.pdf [file 41423_2020_459_MOESM1_ESM.pdf]
